# Supplementary material for: A natural polymer with desirable self-healing and recyclable, antibacterial, and adhesive properties based on turpentine monomer
Source: Royal Society of Chemistry journal article supplement (doi:10.1039/d2qm00989g), 2023-01-01
Supplement: d2qm00989g1.pdf [file d2qm00989g1.pdf]

### Electronic Supplementary information

A natural polymer with desirable self-healing and recyclable, antibacterial, and adhesive properties based on  
turpentine monomer

Shanshan Wang<sup>a</sup>, Yuemin Zhou<sup>a</sup>, Yuqi Wang<sup>a</sup>, Fuhao Dong<sup>b, \*</sup>, He Liu<sup>b</sup>, and Xu Xu<sup>a, \*</sup>

a. College of Chemical Engineering, Nanjing Forestry University, Co-Innovation Center of Efficient Processing and Utilization of Forest Resources, Jiangsu Provincial Key Lab for the Chemistry and Utilization of Agro-forest Biomass, Nanjing 210037, Jiangsu Province, China.

b. Institute of Chemical Industry of Forestry Products, Chinese Academy of Forestry, Key Laboratory of Biomass Energy and Material, National Engineering Laboratory for Biomass Chemical Utilization, Key and Open Laboratory of Forest Chemical Engineering, State Forestry Administration, Nanjing 210042, Jiangsu Province, China.

\*Corresponding authors: Email: horsedong1993@hotmail.com (F. D.), xuxu200121@hotmail.com (X. X.).

## Results and discussions

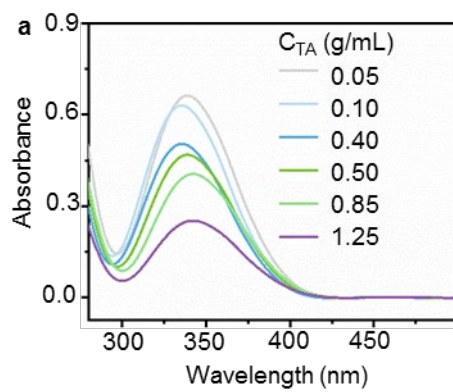

**Fig. S1.** The UV spectrum of the TA solution with different concentration

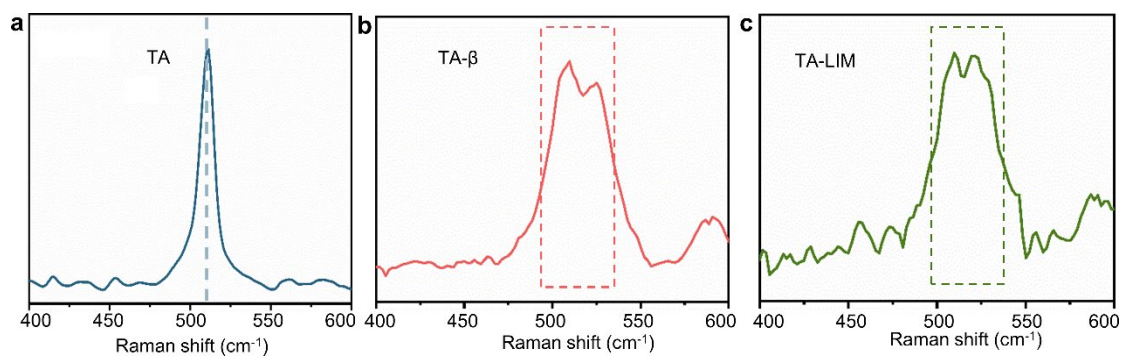

**Fig. S2.** The Raman spectrum of the (a) TA, (b) TA-β, and (c) TA-LIM.

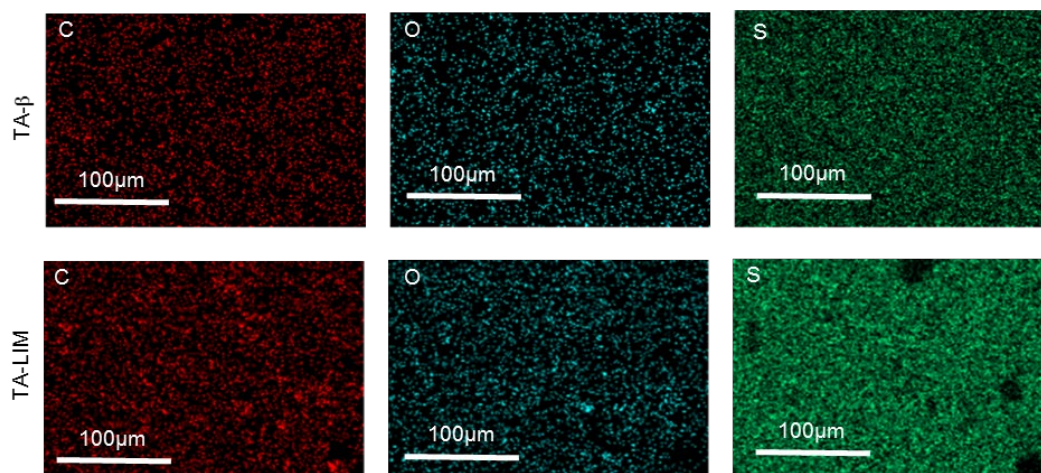

**Fig. S3.** The EDS mappings of TA-β and TA-LIM.

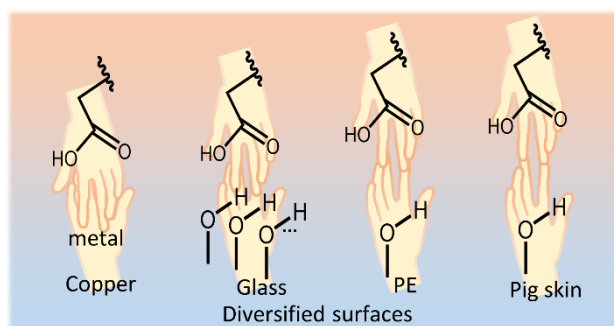

**Fig. S4.** The illustration of the adhesive property of the TA-LIM towards different substrates.

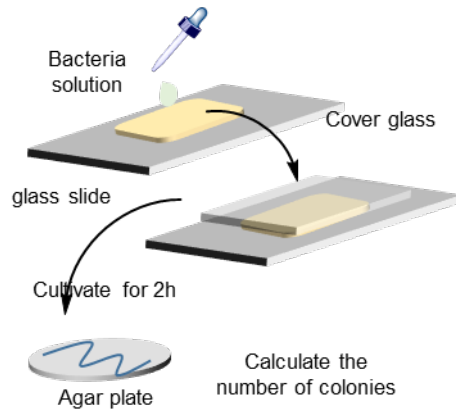

**Fig. S5.** The illustration of the plate count method

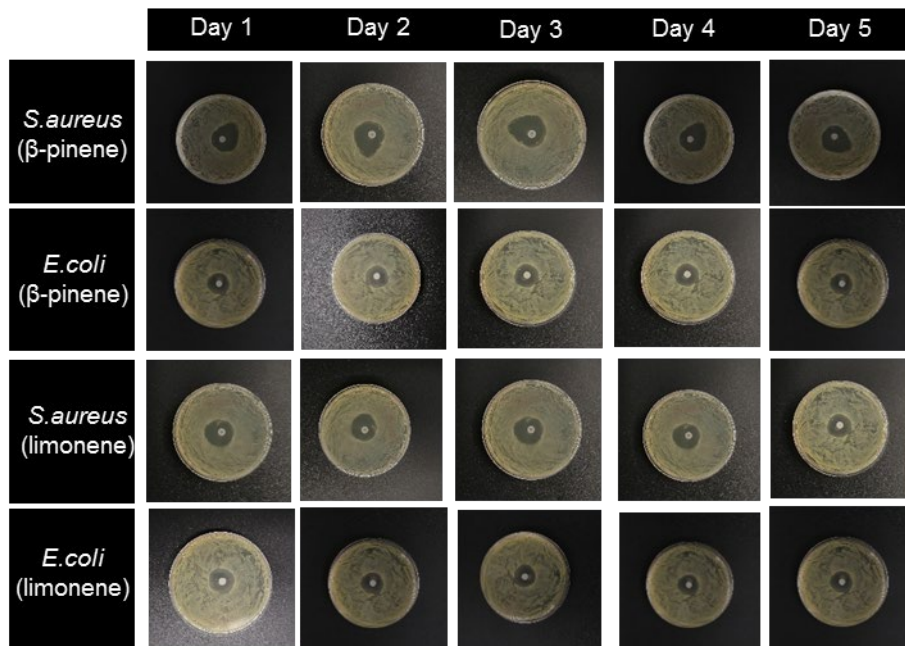

**Fig. S6.** Photos of the diameter of the inhibition zone which treat by the  $\beta$ -pinene and limonene towards *E. coli* and

*S. aureus*

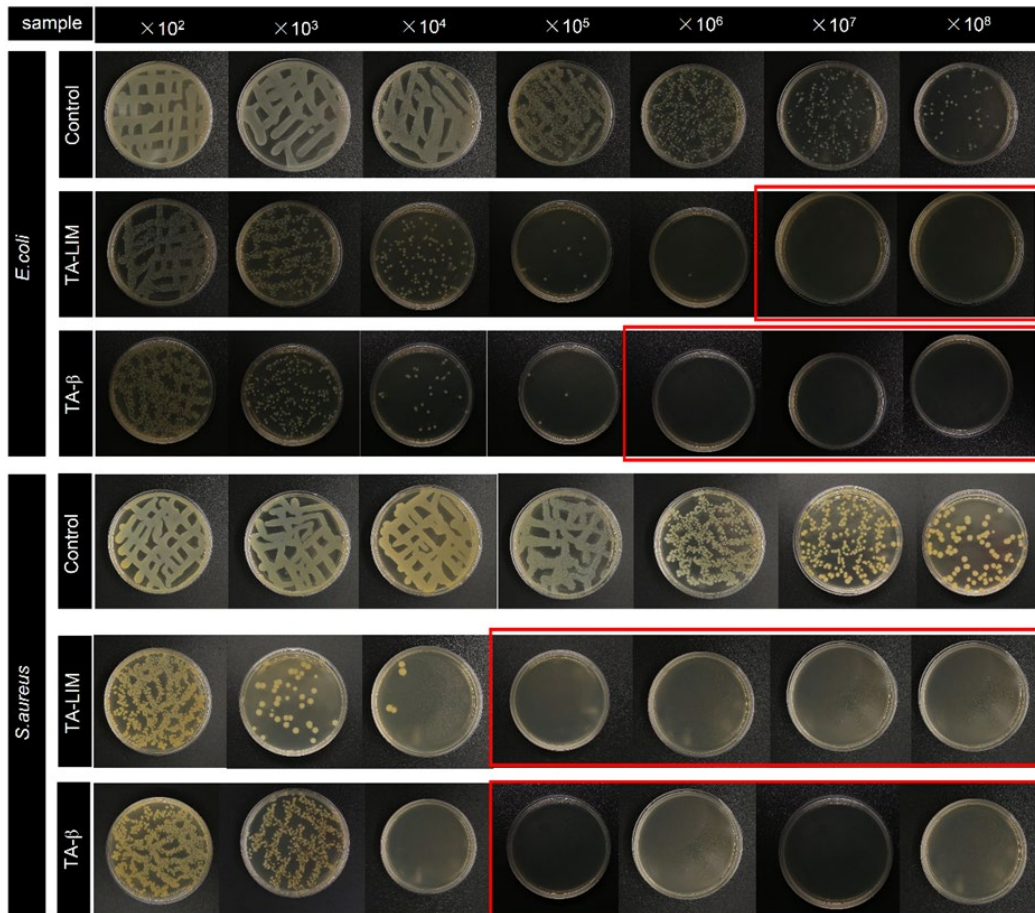

Fig. S7. Photos of the *E. coli* and *S. aureus* which treat by TA-β and TA-LIM

TA-LIM-2

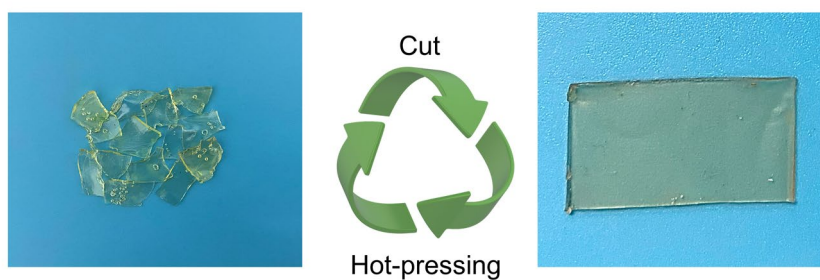

TA- $\beta$ -2

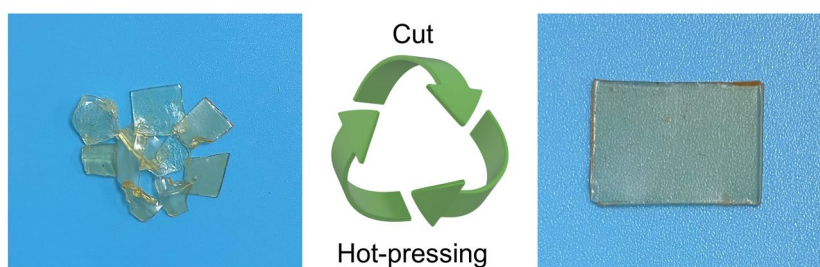

**Fig. S8.** Recycling of TA-LIM-2 and TA- $\beta$ -2 via hot-pressing.

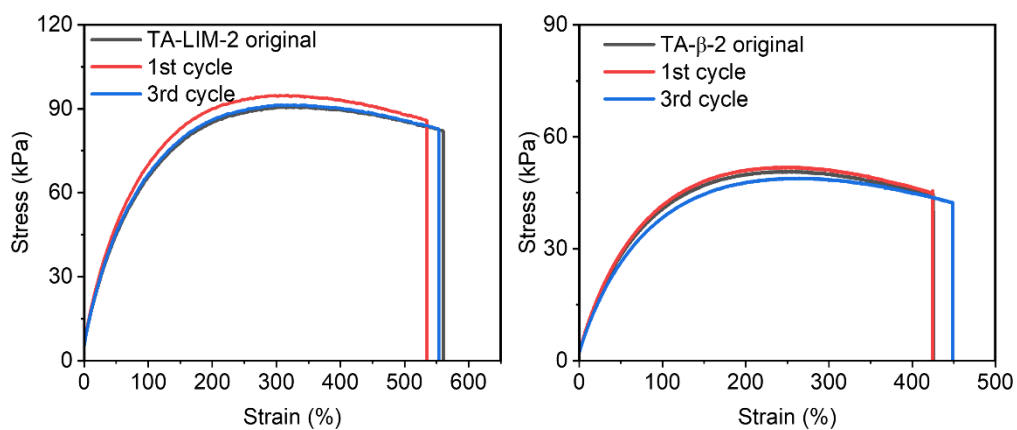

**Fig. S9.** The stress-strain curves of the TA-LIM-2 and TA- $\beta$ -2 after three recycling.

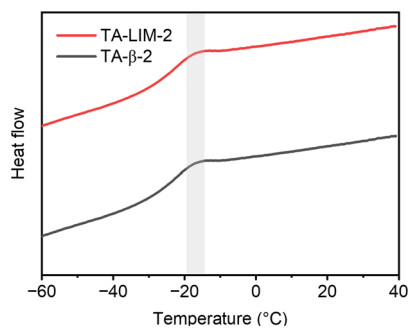

Fig. S10. DSC curves of the TA-LIM-2 and TA- $\beta$ -2.

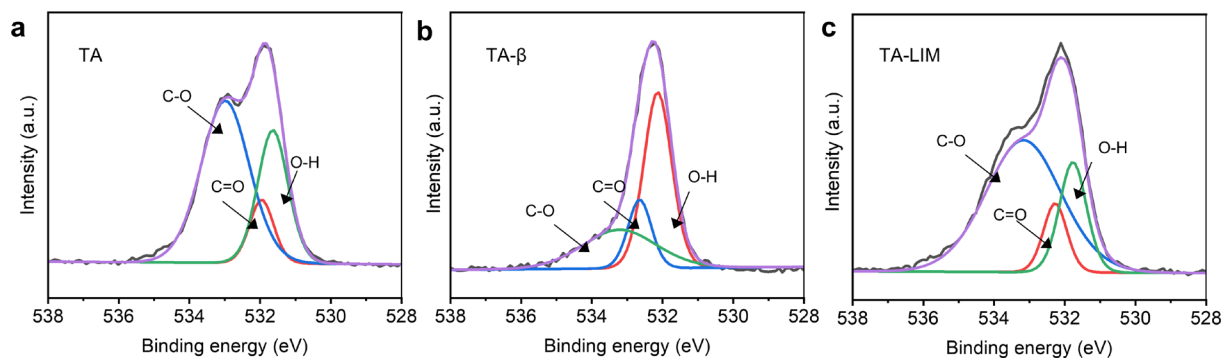

Fig. S11. The Raman spectrum of the (a) TA, (b) TA- $\beta$ , and (c) TA-LIM.

**Table S1.** The compositions of TA-LIM and TA- $\beta$ 

| sample         | TA (g) | Ethanol (mL) | $\beta$ -pinene (g) | Limonene (g) |
|----------------|--------|--------------|---------------------|--------------|
| TA- $\beta$ -1 | 2.00   | 2.00         | 0.10                | /            |
| TA- $\beta$ -2 | 2.00   | 2.00         | 0.15                | /            |
| TA- $\beta$ -3 | 2.00   | 2.00         | 0.20                | /            |
| TA-LIM-1       | 2.00   | 2.00         | /                   | 0.07         |
| TA-LIM-2       | 2.00   | 2.00         | /                   | 0.15         |
| TA-LIM-3       | 2.00   | 2.00         | /                   | 0.25         |

**Table S2.** LB medium

| sample | weight(g/L) |
|--------|-------------|
| TRY    | 10          |
| yeast  | 5           |
| NaCl   | 5           |



**Table S3.** LB-agar medium

| sample | weight(g/L) |
|--------|-------------|
| TRY    | 10          |
| yeast  | 5           |
| NaCl   | 5           |
| agar   | 2           |

**Table S4.** MIC and MBC of the  $\beta$ -pinene and limonene towards different bacteria (Unit: mg/mL)

| Sample          | <i>E.coli</i> |     | <i>S.aureus</i> |     |
|-----------------|---------------|-----|-----------------|-----|
|                 | MIC           | MBC | MIC             | MBC |
| $\beta$ -pinene | 2.5           | 10  | 1.25            | 2.5 |
| limonene        | 5             | 20  | 1.25            | 5   |
